# Supplementary material for: Synthesis of novel cationic carbon dots and application to quantitative detection of K+ in human serum samples
Source: Royal Society of Chemistry journal article supplement (doi:10.1039/c9nj03990b), 2019-01-01
Supplement: c9nj03990b1.pdf [file c9nj03990b1.pdf]

*Supporting Information for*

**Synthesis of a novel cationic carbon dot and application to quantitative detection of K<sup>+</sup> in human serum samples**

Zideng Gao<sup>a</sup>, Shunyi Wang<sup>a</sup>, Zijun Xu<sup>a</sup>, Jin Liu<sup>a</sup>, Yuanfang Huang<sup>a</sup>,

Shuwen Hu<sup>\*a</sup>, Xueqin Ren<sup>\*a</sup>

<sup>a</sup> College of Resources and Environmental Sciences, China Agricultural University, Beijing 100193, China.

\*Corresponding Authors

Shuwen Hu. Tel.: +86 010 62731255; fax: +86 010 62731016.

\*E-mail: shuwenhu@cau.edu.cn (Shuwen Hu)

## **Table of Contents:**

1. Materials and Instruments
2. Synthesis of QRDs
3. Quantum yield measurement
4. Fluorescence stability of QRDs and QCDs+TPBS
5. Zeta potentials of QRDs and QCDs+TPBS
6. Determination of the detection limit
7. Fluorescence determination of  $K^+$  in human blood serum

## **1. Materials and Instruments**

### **Materials**

Quinaldine red was obtained from Shanghai Aladdin, Ltd. (Shanghai, China). Tetraphenylborate sodium and all metal salts (KCl, NaCl, LiCl, BaCl<sub>2</sub>·2H<sub>2</sub>O, HgCl<sub>2</sub>, CdCl<sub>2</sub>·2½H<sub>2</sub>O, ZnSO<sub>4</sub>, MgCl<sub>2</sub>·6H<sub>2</sub>O, CaCl<sub>2</sub>) were purchased from Sinopharm Chemical Reagent Co., Ltd. (Beijing, China). The Human Serum–Pooled was purchased from Beijing Wolcavi Co., Ltd. The other two human blood samples were collected from healthy adult volunteers at Peking University Third Hospital.

### **Instruments**

FT-IR spectra were recorded on a Nicolet NEXUS-470 Spectrometer (Madison, USA) from KBr pellets at room temperature, using an accumulation of 32 scans and a resolution of 4 cm<sup>-1</sup>, in the range of 4000~500 cm<sup>-1</sup>. Samples (2 mg) were thoroughly ground with KBr and pelletized using a hydraulic press under a pressure of 600 kg/cm<sup>2</sup>.

Fluorescence spectra were recorded on an F-7000 fluorescence spectrophotometer (Hitachi, Tokyo, Japan). All fluorescence intensity measurements were performed under the same conditions: the excitation and emission slit widths were both 5 nm, and the excitation wavelength was set at 320 nm, with a recording emission range of 340~600 nm. The photomultiplier tube voltage was set at 700 V. All ultraviolet–visible (UV-Vis) spectra were recorded on a WTF UV-2102PC UV-Vis spectrophotometer (UNICO Shanghai Instrument Co., Ltd., China).

Quantitative determination of K<sup>+</sup> in blood samples were recorded on an atomic absorption spectrometer (PERSEE TAS-990, Beijing, China).

X-ray photoelectron spectroscopy (XPS) results were collected by Thermo escalab 250Xi spectrometer (USA), which uses advanced Advantage data acquisition and processing system to ensure that as much information as possible is extracted from the test data. XPS pre-processing process: appropriate amount of samples are pressed into a tablet less than 1cm.

High-resolution scanning/transmission electron microscope (STEM) (FEI Talos F200 series 200kV) was used to study the morphology of QCDs.

The data of zeta potential of samples was recorded by Mastersizer2000 Model Hydro2000SM (Malvern Instrument Ltd., UK).

## **2. Synthesis of QCDs**

Fig. S1 QR samples at different reaction time and concentrations of sodium hydroxide

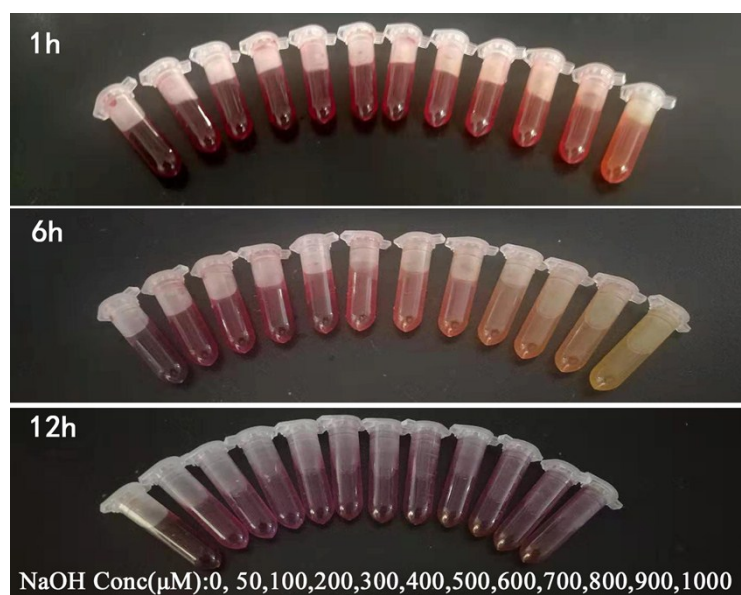

### 3. Quantum yield measurement

The quantum yield ( $\Phi$ ) of QCDs was determined by comparing the integrated fluorescent intensities (excitation at 320 nm) and absorbance values (at 320 nm) of the QCDs samples with those of quinine sulfate (standard). The quantum yield was calculated using equation (S1), where  $\Phi$  is the quantum yield,  $k$  is slope,  $\eta$  is the refractive index of the solvent,  $S$  is the standard and  $X$  is the sample.

$$\Phi_x = \Phi_s \left( \frac{K_x}{K_s} \right) \left( \frac{\eta_x}{\eta_s} \right) \quad (\text{S1})$$

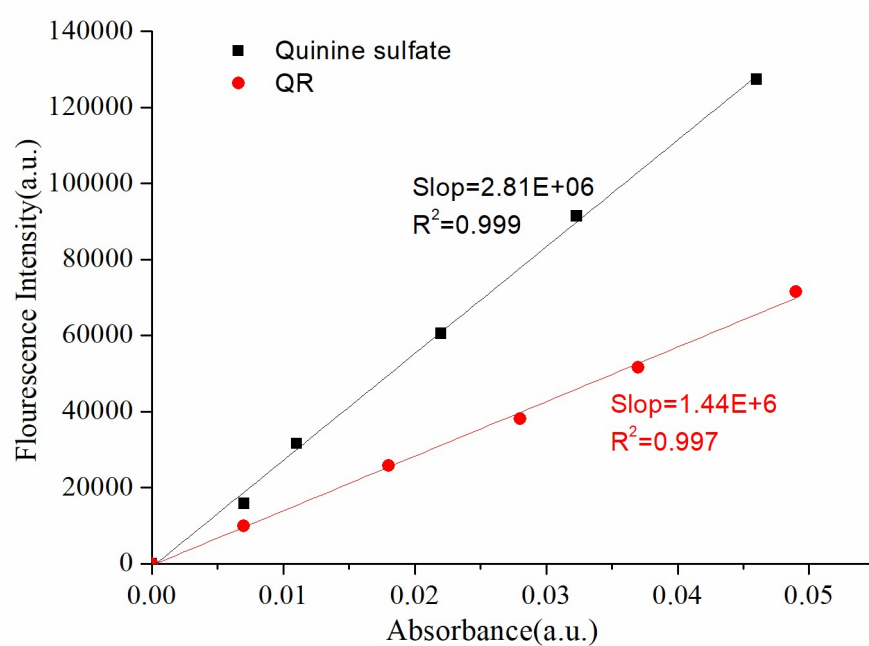

Fig. S2 Liner plots for Quinine sulfate (0.1M H<sub>2</sub>SO<sub>4</sub>,  $\phi_f=0.54$ ) and QR

#### 4. Fluorescence stability of QCDs and QCDs+TPBS

Fig. S3 The photostability of the QCDs and QCDs+TPBS measured by fluorescence

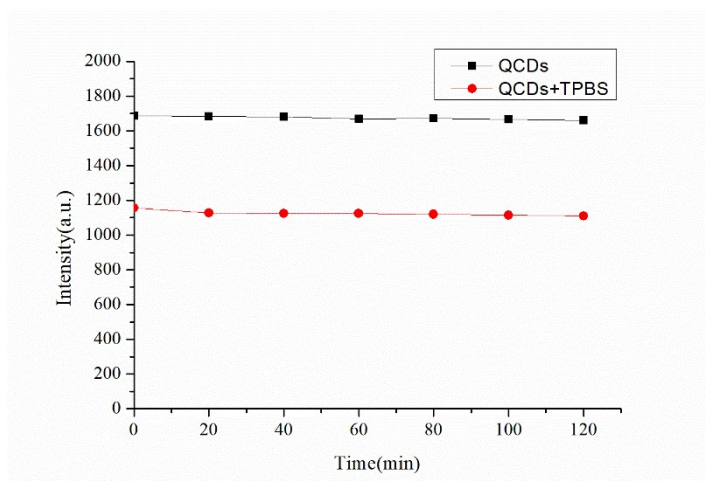

spectrophotometer every 20 min ( $\lambda_{ex} = 320$  nm,  $\lambda_{em} = 400$  nm)

#### 5. Zeta potentials of QRDs and QCDs+TPBS

Fig. S4 Zeta potentials of QRDs(A) and QCDs+TPBS(B)

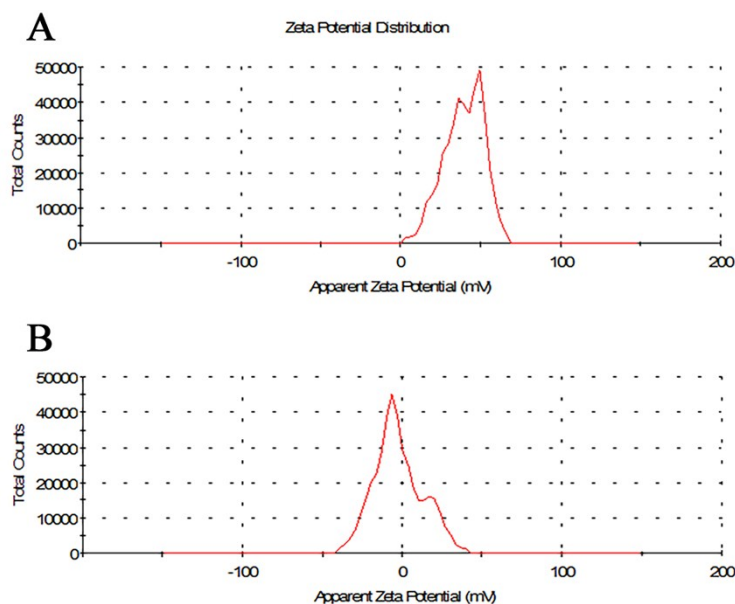

## 6. Determination of the detection limit

The IUPAC recommended method was used for quantitative testing. The signal-to-noise ratio (S/N) of the detection method is first measured, and then the minimum detection limit (LOD) of the detection method is determined. The fluorescence intensity of QR was measured at a specified excitation wavelength (320 nm) and repeated 20 times, thereby obtaining the average absorbance of the blank sample and its associated standard deviation (SD<sub>blank</sub>). This SD<sub>blank</sub> is considered to be the noise (N) of our detection system. Then, a lower concentration (known) standard test sample is subjected to fluorescence emission intensity detection at a specified excitation wavelength of 320 nm. The average value (average sample) is calculated after repeating five times. Finally, S/N can be calculated by the following formula:

$$S/N = (\text{average}_{\text{sample}} - \text{average}_{\text{blank}}) / SD_{\text{blank}} \quad (S2)$$

If the S / N result is greater than 5, the sample is diluted to half of the initial concentration, and the above S / N experimental determination is repeated until the S / N value falls within the range of 3 to 5. The concentration of the analyte satisfying 3 < S/N < 5 is the LOD value.

## 7. Fluorescence determination of K<sup>+</sup> in human blood serum

The blood samples were pretreated to eliminate any protein interference and to improve the

recovery. A 3 mL portion of trichloroacetic acid (quality fraction 15%) was added to 1 mL serum to destroy the activity of proteins in the serum and to precipitate them from the solution. The mixture was centrifuged at 10 000 rpm for 10 min after vigorous shaking for 15 min. The supernatant was obtained and modulated to pH 7.0 utilizing NaOH solution. The treated serum samples were diluted 50 times using ethanol. The spiked samples were prepared by adding different K<sup>+</sup> solutions to the diluted serum samples then the spiked serum samples were analyzed according to the developed protocol. Standard addition and recovery experiment was carried out in the Human Serum-Pooled, and quantitative detection of K<sup>+</sup> was completed in all three blood samples.

Table S1 Determination of K<sup>+</sup> in human serum samples

| plasma samples | Added K <sup>+</sup> ( $\mu$ M) | Found K <sup>+</sup> ( $\mu$ M) | Recovery(%) | RSD(n=3,%) |
|----------------|---------------------------------|---------------------------------|-------------|------------|
| 1              | 5                               | 5.05                            | 101.07      | 8.11       |
| 2              | 10                              | 10.83                           | 108.36      | 16.54      |
| 3              | 20                              | 19.17                           | 95.86       | 11. 16     |
| 4              | 100                             | 95.23                           | 95.23       | 8.49       |

Table S2 Comparison of analytical performance of some assays for K<sup>+</sup> detection

| Analysis methods                                                      | Detection medium                   | LOD<br>(M)             | References |
|-----------------------------------------------------------------------|------------------------------------|------------------------|------------|
| Ion chromatography                                                    | biodiesel samples                  | $1.1 \times 10^{-5}$   | (1)        |
| ICP-AES                                                               | human serum                        | $6.5 \times 10^{-5}$   | (2)        |
| flame atomic absorption<br>spectrometry (F AAS)                       | biodiesel samples                  | $2.6 \times 10^{-7}$   | (3)        |
| Structure-switching aptamers and<br>PicoGreen dye                     | tap water and urine<br>samples     | $2.37 \times 10^{-12}$ | (4)        |
| A tricationic phenylene-<br>ethynylene (N <sup>3+</sup> ) fluorophore | urine samples.                     | $9 \times 10^{-7}$     | (5)        |
| Photoluminescence carbon dots                                         | human serum and red<br>blood cells | $1.0 \times 10^{-12}$  | (6)        |
| Aptamer-based fluorescence                                            | urine samples                      | $7.5 \times 10^{-8}$   | (7)        |

---

sensor

This work

human serum

$5.7 \times 10^{-8}$

---



## References

- (1) L. B. Caland, E. L. C. Silveira, M. Tubino, *Analytica Chimica Acta*, 2012, **718**, 116
- (2) F. Bianchi , M. Maffini , A. Mangia , E. Marengo, C. Mucchino, *J pharmaceut biomed*, 2007, **43**, 659.
- (3) F. H. Lyra, M. T. W. D. Carneiro, G. P. Brandão, H. M. Pessoa, E. V. Castro, *Microchemical Journal*, 2010, **96**, 180.
- (4) Z. Chen, L. Tan, L. Hu, Y. Luan, *Talanta*, 2015, **144**, 247.
- (5) W. Yuanboonlim, W. Siripornnoppakhun, N. Niamnont, P. Rashatasakhon, T. Vilaivan, M. Sukwattanasinitt, *Biosens. Bioelectron*, 2012, **33**, 17.
- (6) L. Zhang, S. Chen, Q. Zhao, H. Huang, *Analytica Chimica Acta*, 2015, **880**, 130.
- (7) C. Huang and H. Chang, *Chem. Commun.*, 2008, 1461.
